# The ER $\beta$ 4 variant induces transformation of the normal breast mammary epithelial cell line MCF-10A; the ER $\beta$ variants ER $\beta$ 2 and ER $\beta$ 5 increase aggressiveness of TNBC by regulation of hypoxic signaling

Michelle Faria<sup>1</sup>, Samaneh Karami<sup>1</sup>, Sergio Granados-Principal<sup>2</sup>, Prasenjit Dey<sup>3,4</sup>, Akanksha Verma<sup>5</sup>, Dong S. Choi<sup>6</sup>, Olivier Elemento<sup>5</sup>, Tasneem Bawa-Khalife<sup>1</sup>, Jenny C. Chang<sup>6</sup>, Anders M. Strom<sup>1</sup> and Jan-Åke Gustafsson<sup>1,7</sup>

<sup>1</sup>University of Houston, Department of Biology and Biochemistry, Center for Nuclear Receptors and Cell Signaling, Science & Engineering Research Center, Houston, Texas, USA

<sup>2</sup>Department of Medical Oncology, Hospital of Jaen, Jaen, Spain

<sup>3</sup>Department of Cancer Biology, The University of Texas MD Anderson Cancer Center, Houston, Texas, USA

<sup>4</sup>Department of Genomic Medicine, The University of Texas MD Anderson Cancer Center, Houston, Texas, USA

<sup>5</sup>Institute for Computational Biomedicine, Department of Physiology and Biophysics Weill Cornell Medicine, New York, NY, USA

<sup>6</sup>Methodist Cancer Center, Houston Methodist Hospital, Houston, Texas, USA

<sup>7</sup>Department of BioSciences and Nutrition, Karolinska Institutet, Huddinge, Sweden

**Correspondence to:** Anders M. Strom, **email:** amstrom@uh.edu

**Keywords:** *slug*; *twist1*; *SOX2*; *CD133*; *c-Myc*

**Received:** July 22, 2017

**Accepted:** November 05, 2017

**Published:** January 10, 2018

**Copyright:** Faria et al. This is an open-access article distributed under the terms of the Creative Commons Attribution License 3.0 (CC BY 3.0), which permits unrestricted use, distribution, and reproduction in any medium, provided the original author and source are credited.

## ABSTRACT

Triple negative breast cancer (TNBC) still remains a challenge to treat in the clinic due to a lack of good targets for treatment. Although TNBC lacks expression of ER $\alpha$ , the expression of ER $\beta$  and its variants are detected quite frequently in this cancer type and can represent an avenue for treatment. We show that two of the variants of ER $\beta$ , namely ER $\beta$ 2 and ER $\beta$ 5, control aggressiveness of TNBC by regulating hypoxic signaling through stabilization of HIF-1 $\alpha$ . RNA-seq of patient derived xenografts (PDX) from TNBC shows expression of ER $\beta$ 2, ER $\beta$ 4 and ER $\beta$ 5 variants in more than half of the samples. Furthermore, expression of ER $\beta$ 4 in the immortalized, normal mammary epithelial cell line MCF-10A that is resistant to tumorsphere formation caused transformation and development of tumorspheres. By contrast, ER $\beta$ 1, ER $\beta$ 2 or ER $\beta$ 5 were unable to support tumorsphere formation. We have previously shown that all variants except ER $\beta$ 1 stabilize HIF-1 $\alpha$  but only ER $\beta$ 4 appears to have the ability to transform normal mammary epithelial cells, pointing towards a unique property of ER $\beta$ 4. We propose that ER $\beta$  variants may be good diagnostic tools and also serve as novel targets for treatment of breast cancer.

## INTRODUCTION

Triple negative breast cancer continues to be the most difficult form of breast cancer to treat with few options besides chemotherapy [1–3]. Hypoxic signaling appears to play a crucial role during cancer progression

initiating a more stem cell like character of the cancer cells leading to chemotherapy and radiation resistance [4–14]. It has been shown that presence of HIF-1 $\alpha$  is a negative prognostic factor for breast cancer both in lymph node positive and negative tumors [5, 9, 15–20]. Estrogen receptor  $\beta$  (ER $\beta$ ) was discovered and cloned in 1996 [21],

and shortly after, in 1998, a splice variant of ER $\beta$ , ER $\beta$ 2, was cloned that has a truncated ligand-binding domain (LBD) and a spliced-in unique exon [22]. This variant, which is primate-specific, cannot bind to estrogen or to a classical estrogen response element (ERE). Subsequently, other variants were cloned like ER $\beta$ 4 and ER $\beta$ 5, all with a truncated LBD, spliced-in unique exon and unable to bind estrogen. Currently, no known function in normal physiology has been described for these variants, which appear to be expressed only in cancer and not in normal tissue, indicating that they have a function during development but not in adult life. These variants have for a long time been considered as non-functional or inhibitory factors to ER $\beta$ 1. We have recently shown that they bind to and stabilize both HIF-1 $\alpha$  and HIF-2 $\alpha$  in prostate cancer cells, thus activating hypoxic signaling under normoxic conditions and furthermore are recruited to HIF-1 $\alpha$  response elements in chromatin [23]. Interestingly, ER $\beta$ 1 has been shown to decrease HIF-1 $\alpha$  signaling by up-regulating expression of prolyl dehydrogenase 2 (PDH2) in prostate [24]. Furthermore, ER $\beta$ 1 has been shown to inhibit NF- $\kappa$ B signaling by causing down regulation of IKK $\beta$  through less activation by HIF-1 $\alpha$  [25]. NF- $\kappa$ B correlates with worse prognosis of breast cancer in many studies [26]. NF- $\kappa$ B and HIF signaling are also involved in chemotherapy resistance, where one important drug resistance gene is ABCG2/BCRP, which is a target of both HIF and NF- $\kappa$ B signaling [27, 28].

PDX are often used as a model for clinical cancer although passaging can make the PDX differ from the original cancer in composition of cells. However, RNA-sequencing of early passage PDX can give expression profiles of genes associated with cancer progression and lead to discovery of factors important for breast cancer progression. Tumorsphere assay is a widely used functional assay that enriches for cells with enhanced tumor initiation ability [29, 30], where the normal mammary epithelial cell line MCF-10A is often used as a tool to evaluate the transforming ability of a factor by performing tumorsphere assay [31]. In this report we find that many genes regulated by the ER $\beta$  variants are direct targets of either HIF-1 $\alpha$  or HIF-2 $\alpha$  indicating a potentiation of hypoxic signaling, which has previously been shown to affect breast cancer aggressiveness [4–7, 10, 12, 13, 16, 17, 20]. In addition,

by analyzing PDX subjected to RNA-seq we found that ER $\beta$ 4 and ER $\beta$ 5 are the most widely expressed variants. Expressing ER $\beta$ 4 in normal mammary epithelial cells stimulates anchorage independent growth indicating a transformation ability.

## RESULTS

### Expression of ER $\beta$ variants in PDX from breast cancer and in triple negative breast cancer cell lines

We analyzed expression of ER $\beta$  variants ER $\beta$ 2, ER $\beta$ 4 and ER $\beta$ 5 in 20 breast cancer PDX with RNA-seq. We excluded ER $\beta$ 3 which has not been found in cell lines or tumor samples by us or others [32]. We found the variants to be expressed in 12 out of 20 samples, with ER $\beta$ 4 expressed in 10 samples and ER $\beta$ 5, in 5 samples, and ER $\beta$ 4 and ER $\beta$ 5 co-expressed in 3 samples. ER $\beta$ 2 was expressed in only one PDX, which also expressed ER $\beta$ 4 and ER $\beta$ 5 (Figure 1). Patient primary tumor and xenograft characteristics as well as subtype did not show any correlations to expression of ER $\beta$ 4 or ER $\beta$ 5 (See Supplementary Table 1). Only one PDX # 12 is Her2+ and expresses ER $\beta$ 2, ER $\beta$ 4 and ER $\beta$ 5, all other PDX is of basal type. In order to investigate if the ER $\beta$  variants could transform normal mammary epithelial cells, we used lentivirus transduction to overexpress the ER $\beta$  variants in MCF-10A cells and performed tumorsphere assay. Figure 2A shows expression of variants in the adherent cell line and Figure 2B shows expression in the 1<sup>st</sup> generation of suspended cells and tumorspheres. Since neither control, ER $\beta$ 1, ER $\beta$ 2 nor ER $\beta$ 5 expressing MCF-10A cells form tumorspheres the graph shows expression of ER $\beta$ 1, ER $\beta$ 2 or ER $\beta$ 5 in small aggregates of cells not defined as tumorspheres, while expression of ER $\beta$ 4 occurs in tumorspheres. The MCF-10A cells do not naturally form spheroids since they have a very small population of stem cells [33]. However, we observed that ER $\beta$ 4 expressing MCF-10A cells formed spheroids (Figure 2C–2D, for higher magnification pictures see Supplementary Figure 1). This observation indicates that the induction of ER $\beta$ 4 is sufficient to support anchorage-independent growth or transformation of non-cancerous mammary epithelial

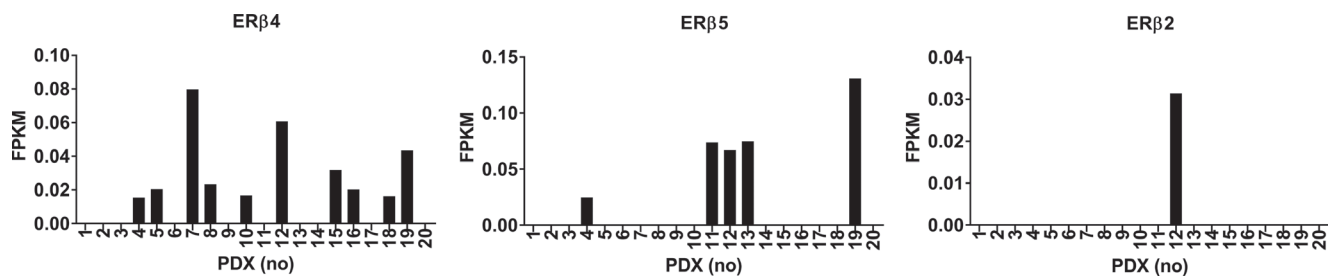

**Figure 1: Analysis of RNA-seq data from breast cancer PDX for expression of ER $\beta$ 2, ER $\beta$ 4 and ER $\beta$ 5.** The data is presented as Fragments per Kilobase of Exon per Million Fragments Mapped (FPKM).

cells. To evaluate whether ER $\beta$  variants also impact self-renewal properties, a single cell suspension of first passage spheroids were regrown in mammosphere conditions to generate second generation spheroids. Only ER $\beta$ 4 expression could propagate spheroid formation (Figure 2E–2F).

Furthermore, we analyzed endogenous expression of ER $\beta$  variants in 4 different TNBC cell lines, BT-549, MDA-MB-231, SUM159 and HCC1806 using quantitative PCR. The variants ER $\beta$ 1, ER $\beta$ 2, ER $\beta$ 4 and ER $\beta$ 5 were expressed at different levels in all cell lines except SUM159 cells, where expression of all variants was very low. The only cell line expressing all four variants endogenously was HCC1806. We then compared

the expression of the variants in SUM159 cells to the rest of the three TNBC cell lines. BT-549 showed expression of ER $\beta$ 4 and ER $\beta$ 5, while one of the most studied TNBC cell lines, MDA-MB-231, showed expression of ER $\beta$ 2 and a low level of ER $\beta$ 4 (Supplementary Figure 2).

### The variants ER $\beta$ 2 and ER $\beta$ 5 regulate genes that correlate to increased aggressiveness of TNBC

We used the SUM159 cell line, which expresses low levels of ER $\beta$  variants, since both ER $\beta$ 2 and ER $\beta$ 5 have been shown to correlate to clinical outcome of breast cancer [34–36], we chose to stably express the ER $\beta$ 2 and ER $\beta$ 5 variants in order to study changes in gene regulation. As

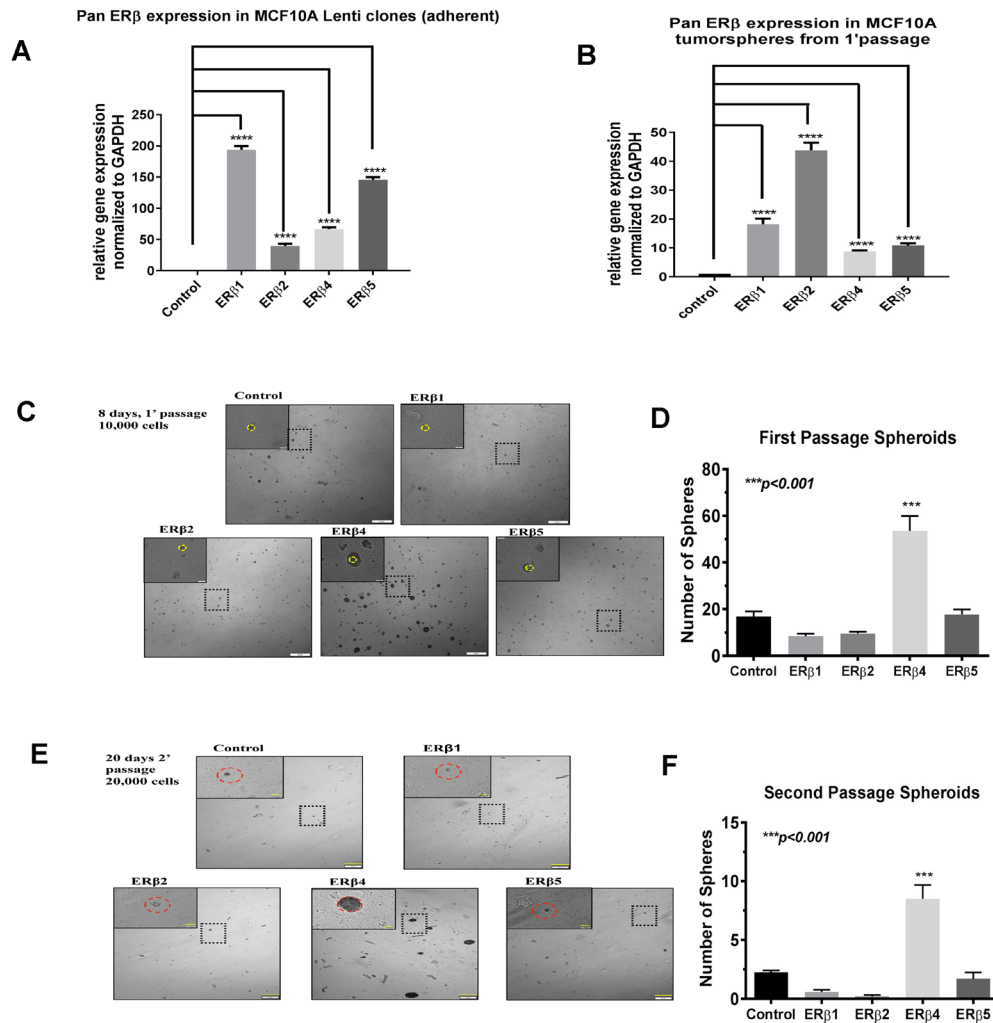

**Figure 2:** (A) Real time PCR was used to evaluate expression of ER $\beta$  variants in adherent MCF-10A cells before grown as spheres in the mammosphere assay. (B) Real time PCR was used to evaluate expression of ER $\beta$  variants in the 1<sup>st</sup> generation of mammospheres after 8 days. (C) Mammosphere formation of 10,000 single MCF-10A cells was evaluated after 8 days in spheroid suspension. Each image represents the population of stable MCF-10A clones; the yellow circle highlights the average size of spheroids observed in Control-clones compared to spheroids in the respective ER- $\beta$  variant clones. (D) For 2 independent experiments, the number of spheroids in first passage studies was evaluated in 5 random images for each MCF-10A clone. Statistical significance was evaluated with ANOVA and Tukey's posthoc test. (E) First passage spheroids were reconstituted in a single-cell suspension and 20,000 cells were grown in spheroid conditions to establish second passage mammospheres. The red circle illustrates the average size of spheroids observed in ER- $\beta$ 4 MCF-10A clones. (F) Second passage spheroids (clusters > 5 cells) were counted in 5 random images and subject to statistical analysis via ANOVA and Tukey's posthoc test.

expected from our previous study in prostate [37], we found many HIF-1 $\alpha$  and HIF-2 $\alpha$  targets being strongly regulated by ER $\beta$ 2 and ER $\beta$ 5 [37] (Figure 3A). Many of the genes regulated have previously been shown to correlate with aggressiveness of breast cancer such as CD24, SOX2, Slug, Twist1, CD-133, N-Cadherin, E-Cadherin, FOXC2, ABCG2, c-Myc, IL8, IL6, and IKK $\beta$  (activating NF- $\kappa$ B signaling). It is interesting to note that many of these genes regulate epithelial mesenchymal transition EMT and stem cells. In a previous study, the growth of the SUM159 cells was shown to be dependent on IL8 and IL6 expression maintained by high serum concentration [38]. Therefore, we investigated if expression of ER $\beta$ 2 and ER $\beta$ 5 in the SUM159 cells at low serum concentration could maintain the cell growth under these conditions. We found that ER $\beta$ 2 and ER $\beta$ 5 can maintain the cell growth at low serum using a growth assay (Figure 3B). In addition, we found that expression of both ER $\beta$ 2 and ER $\beta$ 5 increases HIF-1 $\alpha$  protein expression under normoxic condition and potentiates hypoxia induction of HIF-1 $\alpha$ , establishing a connection between the variants and hypoxic signaling (Figure 3C).

### Expression of ER $\beta$ variants changes proliferation of TNBC cell lines

To investigate the effect on proliferation by ER $\beta$ 1, ER $\beta$ 2, ER $\beta$ 4 and ER $\beta$ 5, we used lentivirus transduced SUM159, MDA-MB-231, BT-549 and HCC1806 cells to express the variants at higher levels and compared to cells transduced with empty lentivirus (Figure 4A). TNBC cell lines showed various effects on proliferation with the different variants, however, ER $\beta$ 2 was most proliferative across all cell lines (Figure 4B). As can be seen in Supplementary Figure 3, there is a pronounced effect on colony formation by ER $\beta$ 2, and less effect by ER $\beta$ 4 and ER $\beta$ 5 in the SUM159 cells. No change in colony formation compared to control was observed for ER $\beta$ 1 in SUM159 cells. In the MDA-MB-231 and BT-549 cells, expression of all variants showed no change from control.

Exposing the SUM159 cell lines expressing the different ER $\beta$  variants to hypoxia shows that ER $\beta$ 1 reduces hypoxic induction of carbonic anhydrase (CAIX) which is a HIF-1 $\alpha$  regulated gene; this is in agreement with ER $\beta$ 1's regulation of prolyl dehydrogenase 2 increasing degradation of HIF-1 $\alpha$ . On the other hand, ER $\beta$ 2, 4 and 5 increase hypoxia-induced levels of CAIX, which is in agreement with our previous studies showing stabilization of HIF-1 $\alpha$  by ER $\beta$ 2 [37] (Figure 5).

## DISCUSSION

Although TNBC lacks expression of ER $\alpha$ , PR and HER2-neu receptors, our data indicates that ER $\beta$  variants are expressed in at least 50% of the TNBC cell lines at mRNA levels. These variants except ER $\beta$ 1 are primate-specific with no known ligands, In addition, the variants

ER $\beta$ 2, ER $\beta$ 4, and ER $\beta$ 5 appear to be cancer specific i.e. they are not expressed in normal tissue in the adult, which makes them very suitable targets for treatment because a specific drug can potentially show less side effects by having less effect on normal tissue.

Our studies indicate that ER $\beta$  variants can increase aggressiveness of TNBC by promoting hypoxic signaling under normoxia. It is interesting to note that nuclear ER $\beta$ 2 correlates to worse prognosis in ER $\alpha$  negative breast cancer [39]. Another study of more than 2000 breast cancer samples showed that expression of ER $\beta$ 5 was a marker of worse outcome in Her2 positive and TNBC [36]. In a previous study in prostate cancer, we have shown that ER $\beta$ 2 is recruited to HIF response elements in Twist1 and VEGF genes using ChIP-assay [37]. Thus, it appears that ER $\beta$  variants take advantage of hypoxic signaling by stabilizing HIF-1 $\alpha$  and HIF-2 $\alpha$  protein expression to maintain a conducive environment for carcinogenesis. Hypoxic signaling is an adaptive stress response, which activates downstream targets involved with angiogenesis, glucose metabolism, etc. for promoting tumor growth in a low-oxygen, necrotic environment. A recent report by Samanta *et al.* showed that hypoxia inducible factors are required for chemotherapy resistance of breast cancer stem cells [8]. Expression of HIF-2 $\alpha$  can regulate stem cell populations, which would promote tumor cell self-renewal and differentiation into suitable cell lineages to benefit tumor growth [40]. As a strong indication of up-regulated HIF signaling, we observed induction of carbonic anhydrase (CAIX), which is a gene that is dependent on HIF-1 $\alpha$  for its expression [41]; in addition, expression of CAIX in breast tumors correlates to poor prognosis [42]. We found up-regulation of SOX2 by both ER $\beta$ 2 and ER $\beta$ 5. SOX2 expression has been found to be positively associated with TNBC and metastatic breast cancers. Higher SOX2 expression level was found to be correlated with poorer outcomes in TNBC patients [43, 44]. In addition, we found up-regulation of Slug, which is an upstream regulator of SOX2 [44]; expression of Slug is associated with basal-like breast cancer [45]. We also found increased expression of c-Myc in cells expressing ER $\beta$ 2 or ER $\beta$ 5; increased c-Myc expression correlates to bad prognosis in breast cancer [46]. It is interesting to note that HIF-1 $\alpha$  and HIF-2 $\alpha$  have been shown to have opposing effects on transcription of the c-Myc promoter, an effect that has been attributed to the observation that HIF-1 $\alpha$  binds to the C-terminal domain of  $\beta$ -catenin thus interfering with recruitment of the co-activator p300, while HIF-2 $\alpha$  binds to the N-terminus of  $\beta$ -catenin, thus increasing recruitment of p300 and allowing transcription to occur [47]. Over-expression of twist is associated with markers of EMT and predicts poor prognosis in breast cancers via ERK and Akt activation and facilitates bone metastasis [48, 49]. Another regulated factor, CD133, is associated with vasculogenic mimicry (VM) in TNBC,

and is correlated with lymph node positivity and high-grade tumor. The close relationship between CD133 expression and VM might be a key for tumor relapse and progression [50]. The cell surface factor CD24 has

been shown to be an effector of HIF-1 $\alpha$  driven primary tumor growth and metastasis [51]. We also observe the classical indication of EMT by decreased E-Cadherin and increased N-Cadherin, a switch which is associated

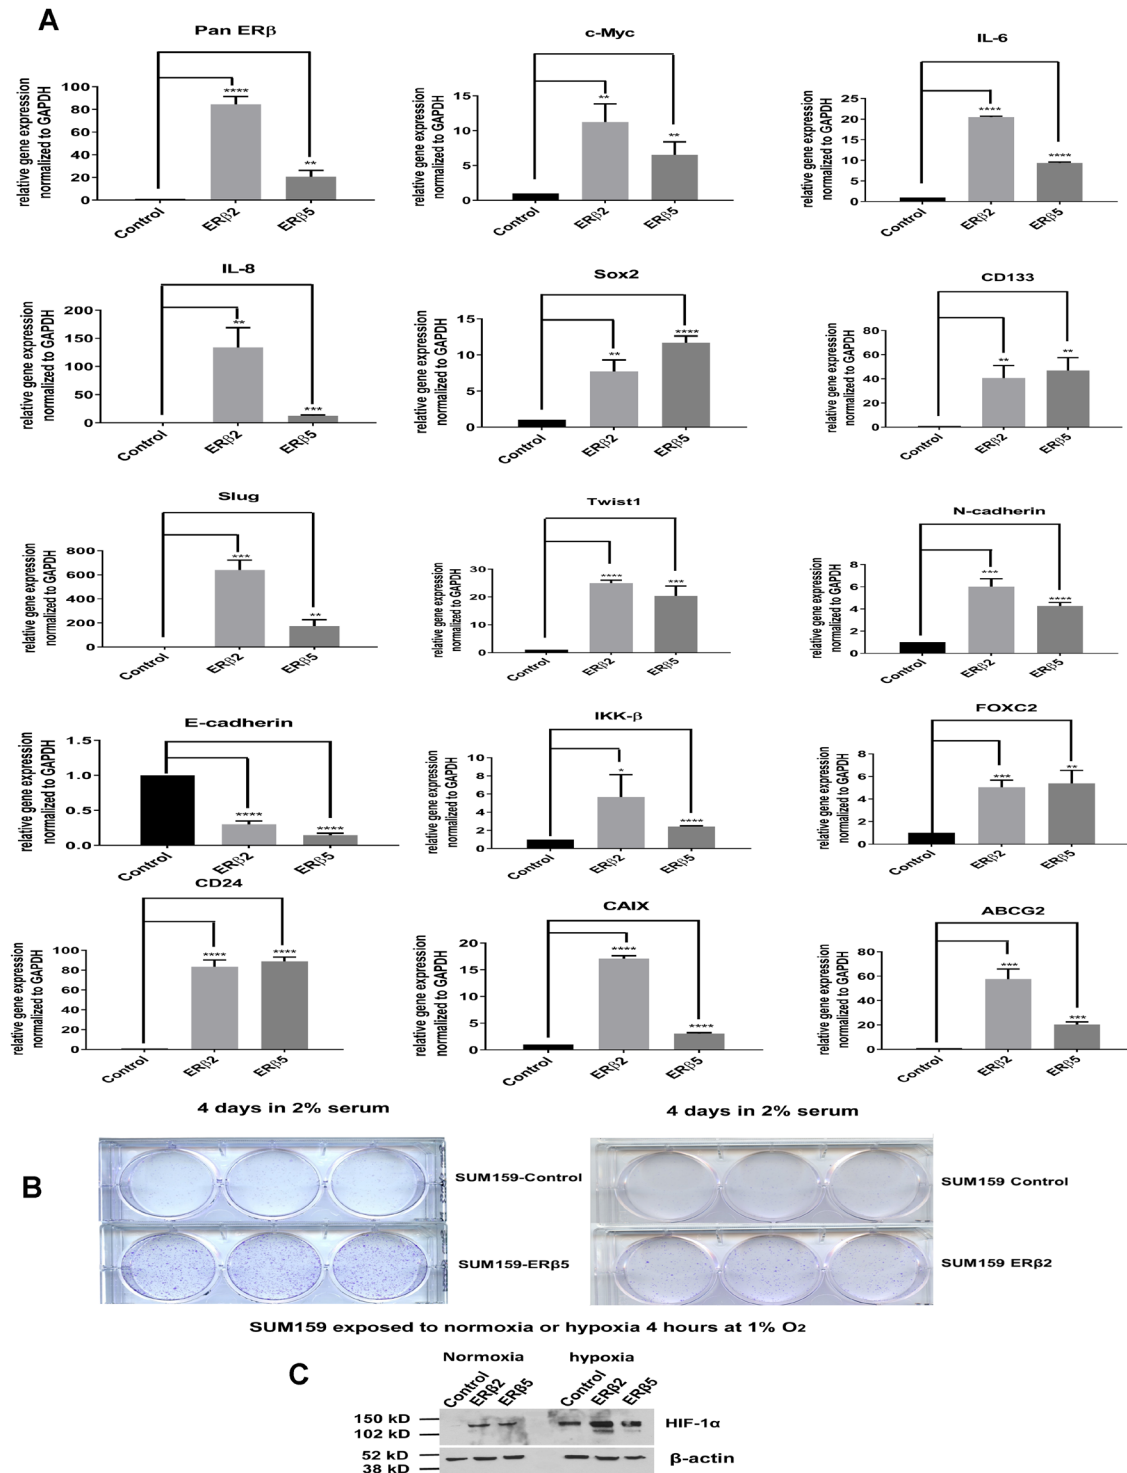

**Figure 3:** (A) SUM159 cells transfected and selected for stable expression of ER $\beta$ 2 and ER $\beta$ 5. Real time PCR was used to analyze changes in signaling pathways (basal cell factors, proliferative factors, EMT inducing and stem cell associated factors as well as NF- $\kappa$ B signaling). (B) 500 cells of each SUM159 ER $\beta$ 2 and ER $\beta$ 5 were plated on each well in a 6 well plate in media containing 2% serum and incubated for 4 days; the cells were visualized with crystal violet staining. (C) Western blot of Control, ER $\beta$ 2 and ER $\beta$ 5 expressing SUM159 cells exposed to normoxia or hypoxia for 4 hours at 1% O<sub>2</sub>, detection by HIF-1 $\alpha$  antibody.

with tumor progression and metastasis. In addition, we found that IL-8 and IL-6 were increased by both ER $\beta$ 2 and ER $\beta$ 5. It is interesting to note that IL-8 has been shown to increase the cancer stem cell population in pancreatic cancer and increase tumorsphere-forming phenotype [52]; IL-8 has also been shown to increase the cancer stem cell population in breast cancer [53–55]. We also found upregulation of FOXC2 by ER $\beta$ 2 and ER $\beta$ 5; expression of FOXC2 is associated with claudin-low/basal B breast tumors or other EMT-/CSC-enriched tumors [56]. Tumors often have hypoxic regions expressing HIF-1 $\alpha$ . We found that the variants affected HIF-1 $\alpha$  expression during normoxia and under hypoxia by a strong potentiation of HIF-1 $\alpha$  expression

when ER $\beta$ 2 and ER $\beta$ 5 were expressed in the SUM159 cells. This indicates that even a mild hypoxia where the variants are expressed could give a survival advantage to the cells. It is interesting to note that a recent paper by Huang et al. [57] shows that ER $\beta$ 2 expression was associated with hypoxic regions in clinical breast cancer samples. In agreement with this we have observed that ER $\beta$ 2 is also stabilized by hypoxia or by HIF-1 $\alpha$  expression (data not shown).

The up-regulation of ABCG2, an important drug efflux transporter gene (53), by ER $\beta$ 2 and ER $\beta$ 5, indicates that ER $\beta$  variants could contribute towards chemo-resistance. Since ER $\beta$ 1 has been shown to decrease hypoxic signaling and the variants increase this

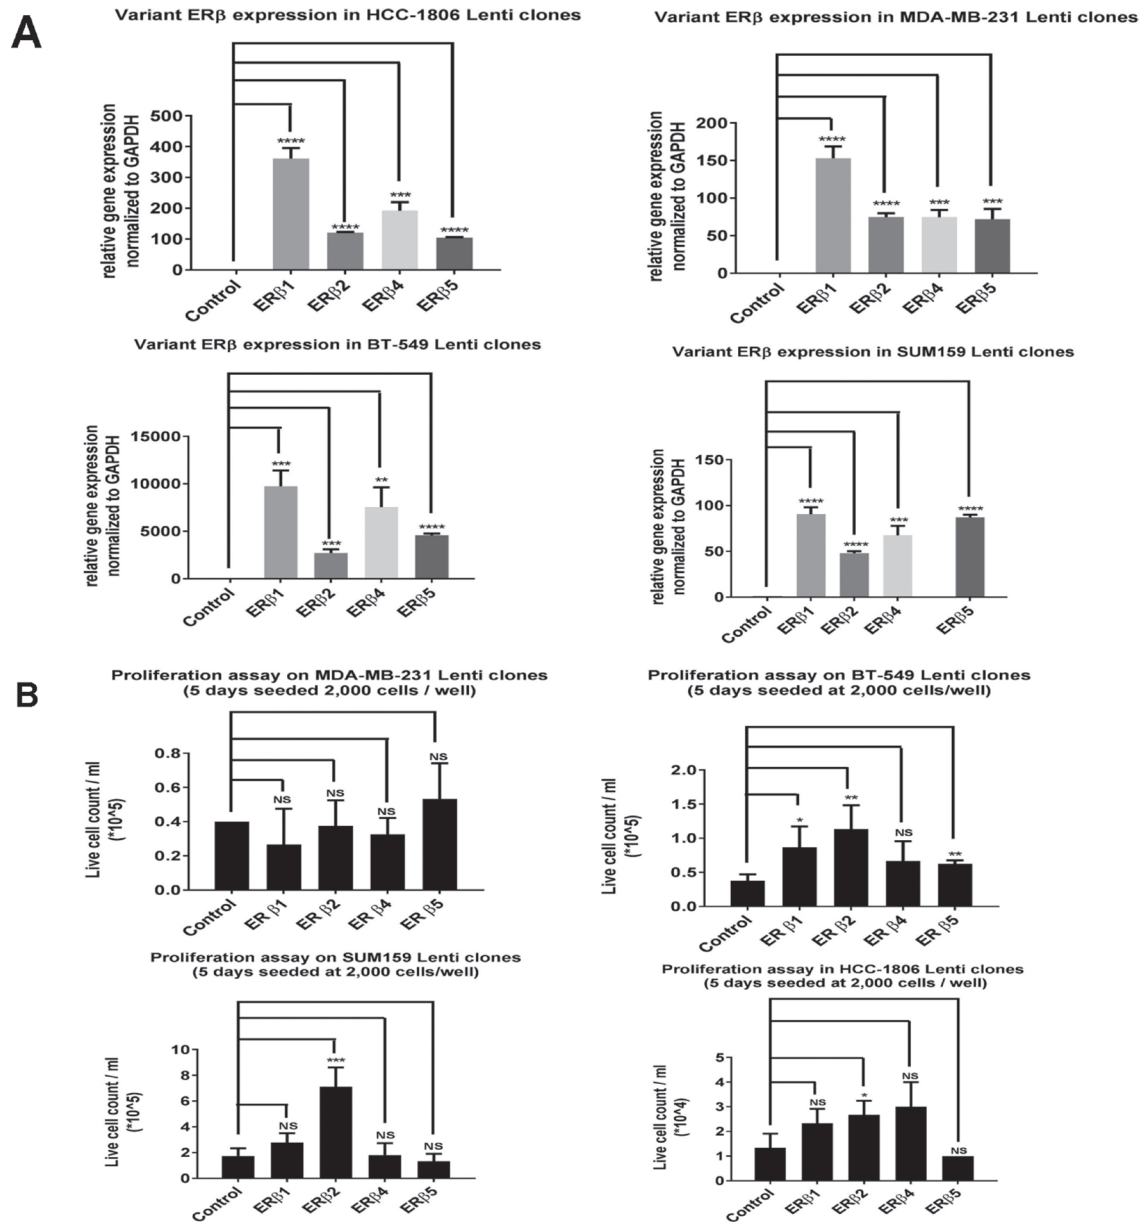

**Figure 4:** (A) Real time PCR was used to evaluate ER $\beta$  variant expression level in the different TNBC cell lines transduced with lentivirus. (B) For proliferation assays 2,000 cells were plated onto triplicates of wells in a 6 well plate into the normal media supplemented with 10% serum. After 5 days at 37°C, 5% CO<sub>2</sub>, the cells were trypsinized and counted using countess.

signaling there could be a delicate balance between the ratios of ER $\beta$ 1 and ER $\beta$  variants at different stages of TNBC progression to allow EMT and migration of tumor cells to form metastases and achieve chemotherapy resistance. We find expression of two of the variants, ER $\beta$ 4 and ER $\beta$ 5, in more than 50% of PDX from breast cancer ( $n = 20$ ). It is also interesting to note that ER $\beta$ 4 induces tumorsphere formation in the immortalized mammary epithelial cell line, MCF-10A. The MCF-10A cells are not forming tumorspheres indicating that the ER $\beta$ 4 variant has a transforming ability and can increase the stem cell population. We find that ER $\beta$ 4 and ER $\beta$ 5 are expressed at a low level in the PDX, however this could be explained by the fact that only a small number of cells are expressing the factors at low levels which could be cancer stem cells. It is interesting to note that although ER $\beta$ 4 is transforming MCF-10A cells, it does not appear to increase proliferation of TNBC cell lines, while ER $\beta$ 2 which is not transforming the MCF-10A cells, is more potent in stimulating proliferation of TNBC cell lines. One can speculate that ER $\beta$ 4 is involved at an early stage of tumor development to expand cancer stem cells, but not needed later to drive tumor progression. Another interesting observation is that ER $\beta$ 2 seems to stimulate proliferation in cell lines showing low endogenous expression of ER $\beta$ 2, like BT-549 and SUM159 cells. A hypothetical overview is presented in Figure 6, linking the variant stabilization of HIF-1 $\alpha$  and HIF-2 $\alpha$  to the effect on gene regulation. More studies are needed to evaluate the full importance of ER $\beta$  variants in TNBC and outlining the mechanism of mammary epithelial transformation by ER $\beta$ 4 possibly leading to use of the variants as drug targets or prognostic factors.

## MATERIALS AND METHODS

### Cell culture and generation of stable ER $\beta$ -expressing cells

The HCC1806, BT-549 and MDA-MB-231 cell lines were obtained from the American Type Culture Collection (ATCC) and maintained in RPMI-1640 (Invitrogen Inc., Carlsbad, CA) medium supplemented with 10% fetal bovine serum (FBS) (Sigma, St. Louis, MO), 2 mM L-glutamine, and 25 mM HEPES buffer (Invitrogen Carlsbad, CA). The MCF-10A cell line was given by Dr. Christoforos Thomas. The SUM159 cell line was a gift from Dr. Cecilia Williams and was maintained in DMEM (Invitrogen Inc., Carlsbad, CA) medium supplemented with 10% fetal bovine serum (FBS) (Sigma, St. Louis, MO). For ligand treatment, the medium was changed to phenol red-free RPMI-1640 supplemented with 2% dextran-coated charcoal-treated FBS (DCC) (Sigma, St. Louis, MO). All experiments used the cells below passage 30.

### PDX model

The PDX model was developed as described by Zhan et al. [58]

### RNA-Seq alignment and quantification

Raw sequenced reads were aligned to the Human reference genome (Version hg19 from UCSC) using STAR (Version 2.4.2) aligner. Aligned reads were quantified against the reference annotation (hg19 from UCSC) to obtain FPKM (Fragments per Kilobase per million) using CuffLinks (v 2.2.1).

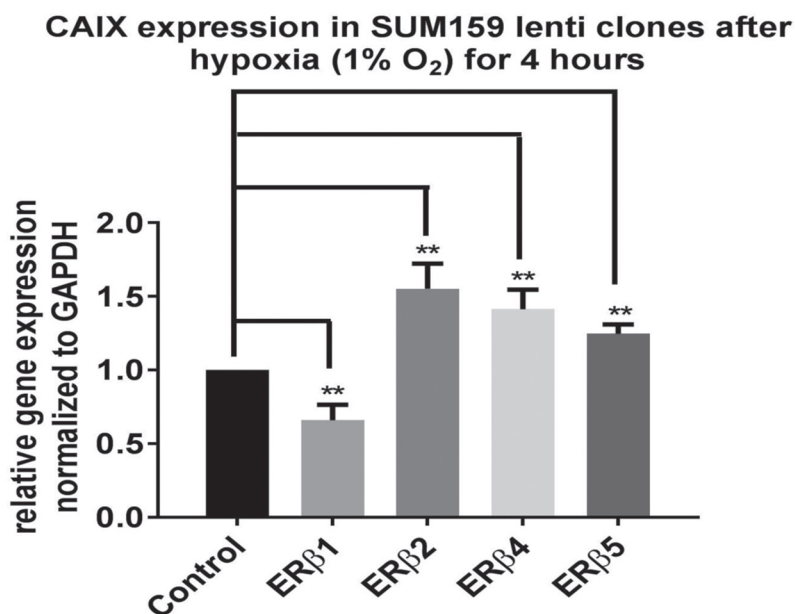

**Figure 5:** SUM159 cells expressing different ER $\beta$  variants were exposed to hypoxia 1% O<sub>2</sub> for 4 hours. RNA was prepared and analyzed using real time PCR for analysis of regulation of the hypoxia-induced CA-IX.

## Construction of an inducible system for ERβ2 and ERβ5

We used the breast cancer cell line SUM159, that expresses low levels of endogenous ERβ2 or ERβ5 to investigate gene regulation of the ERbeta variants. To introduce expression, we used a transposon-based system, stably transfected into SUM159 breast cancer cells with the ERβ constructs (SUM159-ERβ2 and SUM159-ERβ5) or with empty vector (SUM159-control) as a control. The transposon-based system consisted of two plasmids: (a) pIR-TRE, which contains a pair of transposon elements (IR) to allow the efficient integration of the plasmid and the gene (ERβ2 or ERβ5) into the genomic DNA, and (b) piggybac, which expresses the transposase enzyme required for the integration of the transposon element. The pIR-TRE plasmid also contained a bi-directional promoter expressing the GFP gene in one direction and the tetracycline-regulated ERβ (Tet-off) gene in the other direction. The transactivator for Tet-off system regulation via the tetracycline response element (TRE) was from a third plasmid, pTAN. The ERβ genes were cloned into the PvuII/NheI (Promega, Madison, WI) site of pIR-TRE. All of the plasmids were transfected using Lipofectamine 2000 (Invitrogen Inc., Carlsbad, CA) in Opti-Mem medium (Invitrogen Carlsbad, CA) according to the manufacturer's protocol. Complete

DMEM medium with 10% FBS medium was added after 6 h of incubation with the transfection reagents.

## Lentivirus transduction of cells producing stable cells

As an alternative expression system we cloned all the FLAG tagged ERβ variants ERβ1, ERβ2, ERβ4 and ERβ5 into lenti6-TOPO and infected the 5 different cell lines SUM159, HCC1806, MDA-MB-231, BT-549 and MCF-10A with virus at 2 m.o.i. The cells were selected with 5 μg/ml of blasticidine for at least one week before analysis.

## Colony formation assay

Cells were seeded onto a 6 well plate at a density of 500 cells/well in media containing 10% FBS; for HCC1806, RPMI1640 was used and for SUM159, DMEM was used. The plates were incubated at 37°C in 5% CO<sub>2</sub> atmosphere for one week and then stained with 0.5% crystal violet, 6% glutaraldehyde in water.

## Tumorsphere assay of MCF-10A

Tumorsphere assay was performed as described in Karami et al., "Novel SUMO-Protease SENP7S Regulates β-catenin Signaling and Mammary Epithelial Cell Transformation" Scientific Reports, April 24, 2017.

## Proposed model

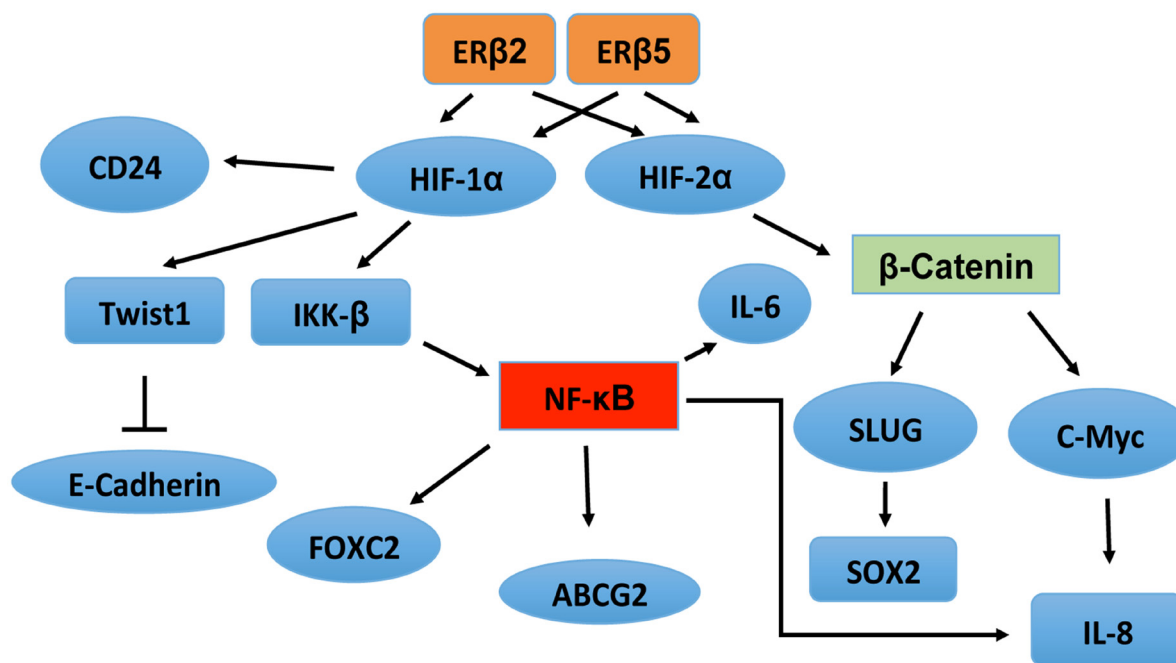

Figure 6: Proposed model showing that the observed gene regulation can be explained by the ability of the ERβ variants to interact with and stabilize HIF-1α and HIF-2α.



## RNA extraction and qPCR

RNA extraction was performed with RNeasy (Qiagen, Valencia CA) according to the manufacturer's protocol. cDNA was synthesized from 1 µg of the total RNA with the iScript First-Strand System according to the standard protocol (BioRad, Hercules, CA). Real-time PCR was performed with the iTaq master mix (BioRad, Hercules, CA). The primers used are given in Supplementary Table 1. All the primers were ordered from Integrated DNA Technologies, Inc. (Coralville, IA). The qPCR reactions were performed with a 7500 Fast Real-Time PCR System (Applied Biosystems Foster City, CA) using optimized conditions for the iTaq dye system: 50°C for 2 min, 95°C for 10 min, followed by 40–50 cycles at 95°C for 15 sec and 60°C for 50 sec. The optimum concentration of primers was determined in preliminary experiments, and the amplification specificity was confirmed by dissociation curve analysis.

## Statistics

The values are expressed as the mean with 95% confidence intervals. An unpaired two-tailed *t*-test was used to compare the differences between two groups. The significance is presented as \**P* < 0.05, \*\**P* < 0.005, and \*\*\**P* < 0.001, \*\*\*\**P* < 0.0001 and non-significant differences are presented as NS.

## Abbreviations

TNBC triple negative breast cancer; PDX patient derived xenograft; LBD ligand binding domain of receptor.

## ACKNOWLEDGMENTS

We thank Dr. Christoforos Thomas for providing the MCF-10A cells, and Dr. Cecilia Williams for providing the SUM159 cells.

## CONFLICTS OF INTEREST

The authors declare no conflicts of interest.

## GRANT SUPPORT

This study was supported by grants from the Swedish cancer society and Robert A. Welch Foundation (E-0004).

## REFERENCES

1. Ali AM, Ansari JA, El-Aziz NMA, Aabozeed W, Warith A, Alsaleh K, Nabholtz JM. Triple Negative Breast Cancer: A

- Tale of Two Decades. *Anticancer Agents Med Chem.* 2017; 17:491–499.
2. Bianchini G, Balko JM, Mayer IA, Sanders ME, Gianni L. Triple-negative breast cancer: challenges and opportunities of a heterogeneous disease. *Nat Rev Clin Oncol.* 2016; 11:674–690.
3. Collignon J, Lousberg L, Schroeder H, Jerusalem G. Triple-negative breast cancer: treatment challenges and solutions. *Breast Cancer (Dove Med Press).* 2016; 8:93–107.
4. Chaudary N, Hill RP. Hypoxia and metastasis in breast cancer. *Breast Dis.* 2006; 26:55–64.
5. Gruber G, Greiner RH, Hlushchuk R, Aebersold DM, Altermatt HJ, Berclaz G, Djonov V. Hypoxia-inducible factor 1 alpha in high-risk breast cancer: an independent prognostic parameter? *Breast Cancer Res.* 2004; 6:R191–198.
6. Hohenberger P, Felgner C, Haensch W, Schlag PM. Tumor oxygenation correlates with molecular growth determinants in breast cancer. *Breast Cancer Res Treat.* 1998; 48:97–106.
7. Keith B, Simon MC. Hypoxia-inducible factors, stem cells, and cancer. *Cell.* 2007; 129:465–472.
8. Samanta D, Gilkes DM, Chaturvedi P, Xiang L, Semenza GL. Hypoxia-inducible factors are required for chemotherapy resistance of breast cancer stem cells. *Proc Natl Acad Sci U S A.* 2014; 111:E5429–5438.
9. Schindl M, Schoppmann SF, Samonigg H, Hausmaninger H, Kwasny W, Gnant M, Jakesz R, Kubista E, Birner P, Oberhuber G, Austrian B, Colorectal Cancer Study Group. Overexpression of hypoxia-inducible factor 1alpha is associated with an unfavorable prognosis in lymph node-positive breast cancer. *Clin Cancer Res.* 2002; 8:1831–1837.
10. Semenza GL. Hypoxia-inducible factors: mediators of cancer progression and targets for cancer therapy. *Trends Pharmacol Sci.* 2012; 33:207–214.
11. Tatum JL, Kelloff GJ, Gillies RJ, Arbeit JM, Brown JM, Chao KS, Chapman JD, Eckelman WC, Fyles AW, Giaccia AJ, Hill RP, Koch CJ, Krishna MC, et al. Hypoxia: importance in tumor biology, noninvasive measurement by imaging, and value of its measurement in the management of cancer therapy. *Int J Radiat Biol.* 2006; 82:699–757.
12. Vaupel P, Briest S, Hockel M. Hypoxia in breast cancer: pathogenesis, characterization and biological/therapeutic implications. *Wien Med Wochenschr.* 2002; 152:334–342.
13. Vaupel P, Mayer A, Briest S, Hockel M. Hypoxia in breast cancer: role of blood flow, oxygen diffusion distances, and anemia in the development of oxygen depletion. *Adv Exp Med Biol.* 2005; 566:333–342.
14. Wilson WR, Hay MP. Targeting hypoxia in cancer therapy. *Nat Rev Cancer.* 2011; 11:393–410.
15. Bos R, van der Groep P, Greijer AE, Shvarts A, Meijer S, Pinedo HM, Semenza GL, van Diest PJ, van der Wall E. Levels of hypoxia-inducible factor-1alpha independently predict prognosis in patients with lymph node negative breast carcinoma. *Cancer.* 2003; 97:1573–1581.

16. Bos R, van Diest PJ, de Jong JS, van der Groep P, van der Valk P, van der Wall E. Hypoxia-inducible factor-1alpha is associated with angiogenesis, and expression of bFGF, PDGF-BB, and EGFR in invasive breast cancer. *Histopathology*. 2005; 46:31–36.
17. Bos R, van Diest PJ, van der Groep P, Greijer AE, Hermsen MA, Heijnen I, Meijer GA, Baak JP, Pinedo HM, van der Wall E, Shvarts A. Protein expression of B-cell lymphoma gene 6 (BCL-6) in invasive breast cancer is associated with cyclin D1 and hypoxia-inducible factor-1alpha (HIF-1alpha). *Oncogene*. 2003; 22:8948–8951.
18. Bos R, van Diest PJ, van der Groep P, Shvarts A, Greijer AE, van der Wall E. Expression of hypoxia-inducible factor-1alpha and cell cycle proteins in invasive breast cancer are estrogen receptor related. *Breast Cancer Res*. 2004; 6:R450–459.
19. Currie MJ, Hanrahan V, Gunningham SP, Morrin HR, Frampton C, Han C, Robinson BA, Fox SB. Expression of vascular endothelial growth factor D is associated with hypoxia inducible factor (HIF-1alpha) and the HIF-1alpha target gene DEC1, but not lymph node metastasis in primary human breast carcinomas. *J Clin Pathol*. 2004; 57:829–834.
20. Dales JP, Garcia S, Meunier-Carpentier S, Andrac-Meyer L, Haddad O, Lavaut MN, Allasia C, Bonnier P, Charpin C. Overexpression of hypoxia-inducible factor HIF-1alpha predicts early relapse in breast cancer: retrospective study in a series of 745 patients. *Int J Cancer*. 2005; 116:734–739.
21. Kuiper GG, Enmark E, Peltö-Huikko M, Nilsson S, Gustafsson JA. Cloning of a novel receptor expressed in rat prostate and ovary. *Proc Natl Acad Sci U S A*. 1996; 93:5925–30.
22. Ogawa S, Inoue S, Watanabe T, Orimo A, Hosoi T, Ouchi Y, Muramatsu M. Molecular cloning and characterization of human estrogen receptor betax: a potential inhibitor of estrogen action in human. *Nucleic Acids Res*. 1998; 26:3505–3512.
23. Dey P, Jonsson P, Hartman J, Williams C, Strom A, Gustafsson JA. Estrogen receptors beta1 and beta2 have opposing roles in regulating proliferation and bone metastasis genes in the prostate cancer cell line PC3. *Mol Endocrinol*. 2012; 26:1991–2003.
24. Mak P, Chang C, Pursell B, Mercurio AM. Estrogen receptor beta sustains epithelial differentiation by regulating prolyl hydroxylase 2 transcription. *Proc Natl Acad Sci U S A*. 2013; 110:4708–4713.
25. Mak P, Li J, Samanta S, Mercurio AM. ERbeta regulation of NF-kB activation in prostate cancer is mediated by HIF-1. *Oncotarget*. 2015; 6:40247–40254. <https://doi.org/10.18632/oncotarget.5377>.
26. Zubair A, Frieri M. Role of nuclear factor-kB in breast and colorectal cancer. *Curr Allergy Asthma Rep*. 2013; 13:44–49.
27. Ke SZ, Ni XY, Zhang YH, Wang YN, Wu B, Gao FG. Camptothecin and cisplatin upregulate ABCG2 and MRP2 expression by activating the ATM/NF-kappaB pathway in lung cancer cells. *Int J Oncol*. 2013; 42:1289–1296.
28. Krishnamurthy P, Ross DD, Nakanishi T, Bailey-Dell K, Zhou S, Mercer KE, Sarkadi B, Sorrentino BP, Schuetz JD. The stem cell marker Bcrp/ABCG2 enhances hypoxic cell survival through interactions with heme. *J Biol Chem*. 2004; 279:24218–24225.
29. Grimshaw MJ, Cooper L, Papazisis K, Coleman JA, Bohnenkamp HR, Chiapero-Stanke L, Taylor-Papadimitriou J, Burchell JM. Mammosphere culture of metastatic breast cancer cells enriches for tumorigenic breast cancer cells. *Breast Cancer Res*. 2008; 10:R52.
30. Ponti D, Costa A, Zaffaroni N, Pratesi G, Petrangolini G, Coradini D, Pilotti S, Pierotti MA, Daidone MG. Isolation and *in vitro* propagation of tumorigenic breast cancer cells with stem/progenitor cell properties. *Cancer Res*. 2005; 65:5506–5511.
31. Imbalzano KM, Tatarkova I, Imbalzano AN, Nickerson JA. Increasingly transformed MCF-10A cells have a progressively tumor-like phenotype in three-dimensional basement membrane culture. *Cancer Cell Int*. 2009; 9:7.
32. Tong D, Schuster E, Seifert M, Czerwenka K, Leodolte S, Zeillinger R. Expression of estrogen receptor beta isoforms in human breast cancer tissues and cell lines. *Breast Cancer Res Treat*. 2002; 71:249–255.
33. Debnath J, Muthuswamy SK, Brugge JS. Morphogenesis and oncogenesis of MCF-10A mammary epithelial acini grown in three-dimensional basement membrane cultures. *Methods*. 2003; 30:256–268.
34. Baek JM, Chae BJ, Song BJ, Jung SS. The potential role of estrogen receptor beta2 in breast cancer. *Int J Surg*. 2015; 14:17–22.
35. Shaaban AM, Green AR, Karthik S, Alizadeh Y, Hughes TA, Harkins L, Ellis IO, Robertson JF, Paish EC, Saunders PT, Groome NP, Speirs V. Nuclear and cytoplasmic expression of ERbeta1, ERbeta2, and ERbeta5 identifies distinct prognostic outcome for breast cancer patients. *Clin Cancer Res*. 2008; 14:5228–5235.
36. Wimberly H, Han G, Pinnaduwa D, Murphy LC, Yang XR, Andrulis IL, Sherman M, Figueroa J, Rimm DL. ERbeta splice variant expression in four large cohorts of human breast cancer patient tumors. *Breast Cancer Res Treat*. 2014; 146:657–667.
37. Dey P, Velazquez-Villegas LA, Faria M, Turner A, Jonsson P, Webb P, Williams C, Gustafsson JA, Strom AM. Estrogen Receptor beta2 Induces Hypoxia Signature of Gene Expression by Stabilizing HIF-1alpha in Prostate Cancer. *PLoS One*. 2015; 10:e0128239.
38. Hartman ZC, Poage GM, den Hollander P, Tsimelzon A, Hill J, Panupinthu N, Zhang Y, Mazumdar A, Hilsenbeck SG, Mills GB, Brown PH. Growth of triple-negative breast cancer cells relies upon coordinate autocrine expression of the proinflammatory cytokines IL-6 and IL-8. *Cancer Res*. 2013; 73:3470–3480.
39. Chantzi NI, Tiniakos DG, Palaiologou M, Goutas N, Filippidis T, Vassilaros SD, Dhimolea E, Mitsiou DJ, Alexis MN. Estrogen receptor beta 2 is associated with

- poor prognosis in estrogen receptor alpha-negative breast carcinoma. *J Cancer Res Clin Oncol*. 2013; 139:1489–1498.
40. Covello KL, Kehler J, Yu H, Gordan JD, Arsham AM, Hu CJ, Labosky PA, Simon MC, Keith B. HIF-2alpha regulates Oct-4: effects of hypoxia on stem cell function, embryonic development, and tumor growth. *Genes Dev*. 2006; 20:557–570.
  41. Kaluz S, Kaluzova M, Liao SY, Lerman M, Stanbridge EJ. Transcriptional control of the tumor- and hypoxia-marker carbonic anhydrase 9: A one transcription factor (HIF-1) show? *Biochim Biophys Acta*. 2009; 1795:162–172.
  42. Ivanova L, Zandberga E, Silina K, Kalnina Z, Abols A, Endzelins E, Vendina I, Romanchikova N, Hegmane A, Trapencieris P, Eglitis J, Line A. Prognostic relevance of carbonic anhydrase IX expression is distinct in various subtypes of breast cancer and its silencing suppresses self-renewal capacity of breast cancer cells. *Cancer Chemother Pharmacol*. 2015; 75:235–246.
  43. Liu K, Xie F, Gao A, Zhang R, Zhang L, Xiao Z, Hu Q, Huang W, Huang Q, Lin B, Zhu J, Wang H, Que J, et al. SOX2 regulates multiple malignant processes of breast cancer development through the SOX2/miR-181a-5p, miR-30e-5p/TUSC3 axis. *Mol Cancer*. 2017; 16:62.
  44. Samanta S, Sun H, Goel HL, Pursell B, Chang C, Khan A, Greiner DL, Cao S, Lim E, Shultz LD, Mercurio AM. IMP3 promotes stem-like properties in triple-negative breast cancer by regulating SLUG. *Oncogene*. 2016; 35:1111–1121.
  45. Storci G, Sansone P, Trere D, Tavolari S, Taffurelli M, Ceccarelli C, Guarnieri T, Paterini P, Pariali M, Montanaro L, Santini D, Chieco P, Bonafe M. The basal-like breast carcinoma phenotype is regulated by SLUG gene expression. *J Pathol*. 2008; 214:25–37.
  46. Chen Y, Olopade OI. MYC in breast tumor progression. *Expert Rev Anticancer Ther*. 2008; 8:1689–1698.
  47. Choi H, Chun YS, Kim TY, Park JW. HIF-2alpha enhances beta-catenin/TCF-driven transcription by interacting with beta-catenin. *Cancer Res*. 2010; 70:10101–10111.
  48. Croset M, Goehrig D, Frackowiak A, Bonnelye E, Ansieau S, Puisieux A, Clezardin P. TWIST1 expression in breast cancer cells facilitates bone metastasis formation. *J Bone Miner Res*. 2014; 29:1886–1899.
  49. Xu Y, Qin L, Sun T, Wu H, He T, Yang Z, Mo Q, Liao L, Xu J. Twist1 promotes breast cancer invasion and metastasis by silencing Foxa1 expression. *Oncogene*. 2017; 36:1157–1166.
  50. Liu TJ, Sun BC, Zhao XL, Zhao XM, Sun T, Gu Q, Yao Z, Dong XY, Zhao N, Liu N. CD133+ cells with cancer stem cell characteristics associates with vasculogenic mimicry in triple-negative breast cancer. *Oncogene*. 2013; 32:544–553.
  51. Kwon MJ, Han J, Seo JH, Song K, Jeong HM, Choi JS, Kim YJ, Lee SH, Choi YL, Shin YK. CD24 Overexpression Is Associated with Poor Prognosis in Luminal A and Triple-Negative Breast Cancer. *PLoS One*. 2015; 10:e0139112.
  52. Chen L, Fan J, Chen H, Meng Z, Chen Z, Wang P, Liu L. The IL-8/CXCR1 axis is associated with cancer stem cell-like properties and correlates with clinical prognosis in human pancreatic cancer cases. *Sci Rep*. 2014; 4:5911.
  53. Charafe-Jauffret E, Ginestier C, Iovino F, Wicinski J, Cervera N, Finetti P, Hur MH, Diebel ME, Monville F, Dutcher J, Brown M, Viens P, Xerri L, et al. Breast cancer cell lines contain functional cancer stem cells with metastatic capacity and a distinct molecular signature. *Cancer Res*. 2009; 69:1302–1313.
  54. Ginestier C, Liu S, Diebel ME, Korkaya H, Luo M, Brown M, Wicinski J, Cabaud O, Charafe-Jauffret E, Birnbaum D, Guan JL, Dontu G, Wicha MS. CXCR1 blockade selectively targets human breast cancer stem cells *in vitro* and in xenografts. *J Clin Invest*. 2010; 120:485–497.
  55. Liu S, Ginestier C, Ou SJ, Clouthier SG, Patel SH, Monville F, Korkaya H, Heath A, Dutcher J, Kleer CG, Jung Y, Dontu G, Taichman R, et al. Breast cancer stem cells are regulated by mesenchymal stem cells through cytokine networks. *Cancer Res*. 2011; 71:614–624.
  56. Hollier BG, Tinnirello AA, Werden SJ, Evans KW, Taube JH, Sarkar TR, Sphyris N, Shariati M, Kumar SV, Battula VL, Herschkowitz JI, Guerra R, Chang JT, et al. FOXC2 expression links epithelial-mesenchymal transition and stem cell properties in breast cancer. *Cancer Res*. 2013; 73:1981–1992.
  57. Huang B, Omoto Y, Iwase H, Yamashita H, Toyama T, Coombes RC, Filipovic A, Warner M, Gustafsson JA. Differential expression of estrogen receptor alpha, beta1, and beta2 in lobular and ductal breast cancer. *Proc Natl Acad Sci U S A*. 2014; 111:1933–1938.
  58. Zhang X, Claerhout S, Prat A, Dobrolecki LE, Petrovic I, Lai Q, Landis MD, Wiechmann L, Schiff R, Giuliano M, Wong H, Fuqua SW, Contreras A, et al. A renewable tissue resource of phenotypically stable, biologically and ethnically diverse, patient-derived human breast cancer xenograft models. *Cancer Res*. 2013; 73:4885–4897.
